# Supplementary material for: Can WRKY transcription factors help plants to overcome environmental challenges?
Source: PubMed Central journal article supplement (PMC6136380; doi:10.1590/1678-4685-gmb-2017-0232), 2018
Supplement: 1415-4757-GMB-41-03-2017-0232-20180717-suppl1.pdf [file 1415-4757-GMB-41-03-2017-0232-20180717-suppl1.pdf]

## Supplementary Material to "Can WRKY transcription factors help plants to overcome environmental challenges?"

**Table S1** - Studies concerning genetic transformation performed with *WRKY* genes in different plant species in response to abiotic stresses. Event (Si: Silencing, OE: Overexpression); reaction: respective phenotype observed under certain stress (T: Tolerance, S: Sensitivity)

| Species                      | Event | Gene                     | Stress                              | Reaction | Reference                    |
|------------------------------|-------|--------------------------|-------------------------------------|----------|------------------------------|
| <i>Arabidopsis thaliana</i>  | OE    | <i>GhWRKY34</i>          | Salt                                | T        | Zhou <i>et al.</i> , 2015    |
| <i>Arabidopsis thaliana</i>  | OE    | <i>AtWRKY28/AtBHLH17</i> | NaCl, mannitol and oxidative stress | T        | Babitha <i>et al.</i> , 2012 |
| <i>Arabidopsis thaliana</i>  | OE    | <i>AtWRKY18</i>          | Salt/Osmotic                        | S        | Chen <i>et al.</i> , 2010    |
| <i>Arabidopsis thaliana</i>  | OE    | <i>AtWRKY60</i>          | Salt/Osmotic                        | S        | Chen <i>et al.</i> , 2010    |
| <i>Arabidopsis thaliana</i>  | OE    | <i>AtWRKY46</i>          | Salt                                | T        | Ding <i>et al.</i> , 2015    |
| <i>Arabidopsis thaliana</i>  | OE    | <i>RtWRKY1</i>           | Salt                                | T        | Du <i>et al.</i> , 2017      |
| <i>Arabidopsis thaliana</i>  | OE    | <i>TaWRKY1</i>           | Heat/Drought                        | T        | He <i>et al.</i> , 2016      |
| <i>Arabidopsis thaliana</i>  | OE    | <i>TaWRKY33</i>          | Heat/Drought                        | T        | He <i>et al.</i> , 2016      |
| <i>Arabidopsis thaliana</i>  | Si    | <i>AtWRKY25</i>          | Heat                                | S        | Li <i>et al.</i> , 2011      |
| <i>Arabidopsis thaliana</i>  | Si    | <i>AtWRKY26</i>          | Heat                                | S        | Li <i>et al.</i> , 2011      |
| <i>Arabidopsis thaliana</i>  | Si    | <i>AtWRKY33</i>          | Heat                                | S        | Li <i>et al.</i> , 2011      |
| <i>Arabidopsis thaliana</i>  | OE    | <i>AtWRKY39</i>          | Heat                                | T        | Li S <i>et al.</i> , 2010    |
| <i>Arabidopsis thaliana</i>  | OE    | <i>VvWRKY11</i>          | Drought                             | T        | Liu <i>et al.</i> , 2011     |
| <i>Arabidopsis thaliana</i>  | OE    | <i>CmWRKY17</i>          | Salt                                | S        | Li <i>et al.</i> , 2015      |
| <i>Arabidopsis thaliana</i>  | OE    | <i>TaWRKY2</i>           | Salt and Drought                    | T        | Niu <i>et al.</i> , 2012     |
| <i>Arabidopsis thaliana</i>  | OE    | <i>TaWRKY19</i>          | Cold, salt and drought              | T        | Niu <i>et al.</i> , 2012     |
| <i>Arabidopsis thaliana</i>  | OE    | <i>HaWRKY76</i>          | Flooding/drought                    | T        | Raineri <i>et al.</i> , 2015 |
| <i>Arabidopsis thaliana</i>  | OE    | <i>AtWRKY39</i>          | Heat                                | T        | Li S <i>et al.</i> , 2010    |
| <i>Arabidopsis thaliana</i>  | OE    | <i>CsWRKY46</i>          | Cold                                | T        | Zhang <i>et al.</i> , 2016   |
| <i>Arabidopsis thaliana</i>  | OE    | <i>GmWRKY54</i>          | Salt                                | T        | Zhou <i>et al.</i> , 2008    |
| <i>Arabidopsis thaliana</i>  | OE    | <i>GmWRKY54</i>          | Drought                             | T        | Zhou <i>et al.</i> , 2008    |
| <i>Arabidopsis thaliana</i>  | OE    | <i>GmWRKY21</i>          | Cold                                | T        | Zhou <i>et al.</i> , 2008    |
| <i>Arabidopsis thaliana</i>  | OE    | <i>GmWRKY21</i>          | Cold                                | T        | Zhou <i>et al.</i> , 2008    |
| <i>Arabidopsis thaliana</i>  | OE    | <i>GmWRKY54</i>          | Salt/Drought                        | T        | Zhou <i>et al.</i> , 2008    |
| <i>Arabidopsis thaliana</i>  | OE    | <i>GhWRKY34</i>          | Salt                                | T        | Zhou <i>et al.</i> , 2015    |
| <i>Arabidopsis thaliana</i>  | OE    | <i>GmWRKY13</i>          | Salt/Drought                        | S        | Zhou <i>et al.</i> , 2008    |
| <i>Gossypium hirsutum</i>    | Si    | <i>GhWRKY27</i>          | Drought                             | T        | Yan <i>et al.</i> , 2015     |
| <i>Gossypium hirsutum</i>    | Si    | <i>GhWRKY27a</i>         | drought                             | T        | Yan <i>et al.</i> , 2015     |
| <i>Nicotiana benthamiana</i> | OE    | <i>GhWRKY41</i>          | Drought/Salt                        | T        | Chu <i>et al.</i> , 2015     |
| <i>Nicotiana sp.</i>         | OE    | <i>GmWRKY57B</i>         | Drought                             | T        | Zhang <i>et al.</i> , 2008   |
| <i>Nicotiana benthamiana</i> | OE    | <i>GhWRKY17</i>          | Drought/Salt                        | S        | Yan <i>et al.</i> , 2014     |
| <i>Nicotiana benthamiana</i> | OE    | <i>GhWRKY25</i>          | Drought/Salt                        | S/T      | Liu <i>et al.</i> , 2015     |

| Species                                                   | Event | Gene            | Stress                     | Reaction | Reference                     |
|-----------------------------------------------------------|-------|-----------------|----------------------------|----------|-------------------------------|
| <i>Nicotiana benthamiana</i>                              | OE    | <i>NbWRKY79</i> | Salt                       | T        | Nam <i>et al.</i> , 2017      |
| <i>Nicotiana benthamiana</i> and <i>Nicotiana tabacum</i> | OE    | <i>BhWRKY1</i>  | Drought                    | T        | Wang <i>et al.</i> , 2009     |
| <i>Nicotiana tabacum</i>                                  | OE    | <i>SIWRKY</i>   | Salt/Drought               | T        | Li <i>et al.</i> , 2012       |
| <i>Nicotiana tabacum</i>                                  | OE    | <i>BcWRKY46</i> | Cold, salinity and Drought | T        | Niu <i>et al.</i> , 2012      |
| <i>Nicotiana tabacum</i>                                  | OE    | <i>TaWRKY1</i>  | Drought                    | T        | Ding <i>et al.</i> , 2016     |
| <i>Oryza sativa</i>                                       | OE    | <i>OsWRKY11</i> | Heat/Drought               | T        | Wu <i>et al.</i> , 2009       |
| <i>Oryza sativa</i>                                       | OE    | <i>OsWRKY74</i> | Phosphate starvation       | T        | Dai <i>et al.</i> , 2016      |
| <i>Oryza sativa</i>                                       | OE    | <i>OsWRKY30</i> | Drought                    | T        | Shen <i>et al.</i> , 2012     |
| <i>Oryza sativa</i>                                       | OE    | <i>OsWRKY76</i> | Cold                       | T        | Yokotani <i>et al.</i> , 2013 |
| <i>Zea mays</i>                                           | OE    | <i>ZmWRKY4</i>  | Cadmium stress             | T        | Hong <i>et al.</i> , 2017     |

At – *Arabidopsis thaliana*, Bh - *Boea hygrometrica*, Bc - *Brassica campestris ssp. chinensis*, Cm - *Chrysanthemum*, Cs - *Cucurbita ssp.*, Gh - *Gossypium hirsutum*, Gm - *Glycine max*, Ha - *Helianthus annuus*, Nb - *Nicotiana benthamiana*, Os - *Oryza sativa*, Rt - *Reaumuria trigyna*, Sl - *Solanum lycopersicum*, Ta - *Triticum aestivum*, Vv - *Vitis vinifera*, Zm - *Zea mays*.

## References

- Babitha KC, Ramu SV, Pruthvi V, Mahesh P, Nataraja KN and Udayakumar M (2012) Co-expression of *AtbHLH17* and *AtWRKY28* confers resistance to abiotic stress in *Arabidopsis*. *Transgenic Res* 22:327-341.
- Chen H, Lai Z, Shi J, Xiao Y, Chen Z and Xu X (2010) Roles of *Arabidopsis* WRKY18, WRKY40 and WRKY60 transcription factors in plant responses to abscisic acid and abiotic stress. *BMC Plant Biol* 10:281.
- Chu X, Wang C, Chen X, Lu W, Li H, Wang X, Hao L and Guo X (2015) The Cotton WRKY Gene *GhWRKY41* positively regulates salt and drought stress tolerance in transgenic *Nicotiana benthamiana*. *Plos One* 10:e0143022.
- Dai X, Wang Y and Zhang WH (2016) *OsWRKY74*, a WRKY transcription factor, modulates tolerance to phosphate starvation in rice. *J Exp Bot* 67:947-960.
- Ding W, Fang W, Shi S, Zhao Y, Li X and Xiao K (2016) Wheat WRKY type transcription factor gene *tawrky1* is essential in mediating drought tolerance associated with an ABA-dependent pathway. *Plant Mol Biol Report* 34:111-1126.
- Ding ZJ, Yan JY, Li CX, Li GX, Wu YR and Zheng SJ (2015) Transcription factor WRKY46 modulates the development of *Arabidopsis* lateral roots in osmotic/salt stress conditions via regulation of ABA signaling and auxin homeostasis. *Plant J* 84:56-69.
- Du C, Zhao P, Zhang H, Li N, Zheng L and Wang Y (2017) The *Reaumuria trigyna* transcription factor *RtWRKY1* confers tolerance to salt stress in transgenic *Arabidopsis*. *J Plant Physiol* 4:48-58.

He GH, Xu JY, Wang YX, Liu JM, Li PS, Chen M, Ma YZ and Xu ZS (2016) Drought-responsive WRKY transcription factor genes *TaWRKY1* and *TaWRKY33* from wheat confer drought and/or heat resistance in *Arabidopsis*. *BMC Plant Biol* 16:116.

Hong C, Cheng D, Zhang G, Zhu D, Chen Y and Tan M (2017) The role of *ZmWRKY4* in regulating maize antioxidant defense under cadmium stress. *Biochem Biophys Res Commun* 482:1504-1510.

Li JB, Luan YS and Jin H (2012) The tomato *SlWRKY* gene plays an important role in the regulation of defense responses in tobacco. *Biochem Biophys Res Commun* 427:671-676.

Li P, Song A, Gao C, Wang L, Wang Y, Sun J, Jiang J, Chen F and Chen S (2015) Chrysanthemum WRKY gene *CmWRKY17* negatively regulates salt stress tolerance in transgenic chrysanthemum and *Arabidopsis* plants. *Plant Cell Rep* 34:1365-1378.

Li S, Fu Q, Chen L, Huang W and Yu D (2011) *Arabidopsis thaliana* WRKY25, WRKY26, and WRKY33 coordinate induction of plant thermo tolerance. *Planta* 233:1237-1252.

Li S, Zhou X, Chen L, Huang W and Yu D (2010) Functional characterization of *Arabidopsis thaliana* WRKY39 in heat stress. *Mol. Cells* 29, 475-483.

Liu H, Yang W, Liu D, Han Y, Zhang A and Li S (2011) Ectopic expression of a grapevine transcription factor *VvWRKY11* contributes to osmotic stress tolerance in *Arabidopsis*. *Mol Biol Rep* 38:417-427.

Liu X, Song Y, Xing F, Wang N, Wen F and Zhu C (2015) *GhWRKY25*, a group I WRKY gene from cotton, confers differential tolerance to abiotic and biotic stresses in transgenic *Nicotiana benthamiana*. *Protoplasma* 253:1265-1281.

Nam TN, Thia LH, Mai DS and Tuan NV (2017) Overexpression of *NbWRKY79* enhances salt stress tolerance in *Nicotiana benthamiana*. *Acta Physiol Plant* 39:121.

Niu CF, Wei W, Zhou QY, Tian AG, Hao YJ, Zhang WK, Ma B, Lin Q, Zhang ZB, Zhang JS, *et al.*, (2012) Wheat WRKY genes *TaWRKY2* and *TaWRKY19* regulate abiotic stress tolerance in transgenic *Arabidopsis* plants. *Plant Cell Environ* 35:1156-1170.

Raineri J, Ribichich KF and Chan RL (2015) The sunflower transcription factor *HaWRKY76* confers drought and flood tolerance to *Arabidopsis thaliana* plants without yield penalty. *Plant Cell Rep* 34:2065-2080.

Shen H, Liu C, Zhang Y and Meng X (2012) OsWRKY30 is activated by MAP kinases to confer drought tolerance in rice. *Plant Mol Biol* 80:241-253.

Wang Z, Zhu Y, Wang L, Liu X, Liu Y, Phillips J and Deng X (2009) A WRKY transcription factor participates in dehydration tolerance in *Boea hygrometrica* by binding to the W-box elements of the galactinol synthase (BhGols1) promoter. *Planta* 230:1155-1166.

Wu X, Shiroto Y, Kishitani S, Ito Y and Toriyama K (2009) Enhanced heat and drought tolerance in transgenic rice seedlings overexpressing *OsWRKY11* under the control of HSP101 promoter. *Plant Cell Rep* 28:21-30.

Yan H, Jia H, Chen X, Hao L, An H and Guo X (2014) The cotton WRKY transcription factor *GhWRKY17* functions in drought and salt stress in transgenic *Nicotiana benthamiana* through ABA signaling and the modulation of reactive oxygen species production. *Plant Cell Physiol* 55:2060-2076.

Yan Y, Jia H, Wang F, Wang C, Shuchang Liu and Xingqi Guo (2015) Overexpression of *GhWRKY27a* reduces tolerance to drought stress and resistance to *Rhizoctonia solani* infection in transgenic *Nicotiana benthamiana*. *Front Physiol* 6:265.

Yokotani N, Sato Y, Tanabe S, Chujo T, Shimizu T, Okada K, Yamane H, Shimono M, Sugano S, Takatsuji H, *et al.* (2013) WRKY76 is a rice transcriptional repressor playing opposite roles in blast disease resistance and cold stress tolerance. *J Exp Bot* 64:5085-5097.

Zhang L, Wang X, Bi Y, Zhang C, Fan YL and Wang L (2008) Isolation and functional analysis of transcription factor *GmWRKY57B* from soybean. *Chin Sci Bull* 53:3538-3545.

Zhang Y, Yu H, Yang X, Li Q, Ling J, Wang H, Gu X, Huang S and Jiang W (2016) *CsWRKY46*, a WRKY transcription factor from cucumber, confers cold resistance in transgenic-plant by regulating a set of cold-stress responsive genes in an ABA-dependent manner. *Plant Physiol Biochem* 108:478-487.

Zhou L, Wang NN, Gong SY, Lu Rui, Li Y and Li XB (2015) Overexpression of a cotton (*Gossypium hirsutum*) WRKY gene, *GhWRKY34*, in *Arabidopsis* enhances salt-tolerance of the transgenic plants. *Plant Physiol Biochem* 96:311-320.

Zhou QY, Tian AG, Zou HF, Xie ZM, Lei G, Huang J, Wang CM, Wang HW, Zhang JS and Chen SY (2008) Soybean WRKY-type transcription factor genes, *GmWRKY13*, *GmWRKY21*, and *GmWRKY54*, confer differential tolerance to abiotic stresses in transgenic *Arabidopsis* plants. *Plant Biotechnol J* 6:486-503.
