# Supplementary material for: Can WRKY transcription factors help plants to overcome environmental challenges?
Source: PubMed Central journal article supplement (PMC6136380; doi:10.1590/1678-4685-gmb-2017-0232), 2018
Supplement: 1415-4757-GMB-41-03-2017-0232-20180717-suppl2.pdf [file 1415-4757-GMB-41-03-2017-0232-20180717-suppl2.pdf]

## Supplementary Material to "Can WRKY transcription factors help plants to overcome environmental challenges?"

**Table S2** - Gene transformation studies performed with *WRKY* genes in different plant species in response to biotic stresses. Event (Si: Silencing, OE: Overexpression); reaction: respective phenotype observed under certain stress (R: Resistance, S: Susceptibility)

| Species                      | Event | Gene              | Stress                                                | Reaction | Reference                              |
|------------------------------|-------|-------------------|-------------------------------------------------------|----------|----------------------------------------|
| <i>Arabidopsis thaliana</i>  | OE    | <i>PtrWRKY89</i>  | <i>Botrytis cinerea</i>                               | S        | Jiang <i>et al.</i> , 2016             |
| <i>Arabidopsis thaliana</i>  | OE    | <i>PtrWRKY73</i>  | <i>Botrytis cinerea/Pseudomonas syringae pv</i>       | S/R      | Duan <i>et al.</i> , 2015              |
| <i>Arabidopsis thaliana</i>  | Si    | <i>AtWRKY75</i>   | <i>Pseudomonas syringae</i>                           | S        | Encinas-Villarejo <i>et al.</i> , 2009 |
| <i>Arabidopsis thaliana</i>  | OE    | <i>FaWRKY1</i>    | <i>Pseudomonas syringae</i>                           | R        | Encinas-Villarejo <i>et al.</i> , 2009 |
| <i>Arabidopsis thaliana</i>  | OE    | <i>AtWRKY75</i>   | <i>Pseudomonas syringae</i>                           | R        | Encinas-Villarejo <i>et al.</i> , 2009 |
| <i>Arabidopsis thaliana</i>  | OE    | <i>OsWRKY23</i>   | <i>Pseudomonas syringae</i>                           | R        | Shaojuan <i>et al.</i> , 2009          |
| <i>Arabidopsis thaliana</i>  | Si    | <i>AtWRKY48</i>   | <i>Pseudomonas syringae</i>                           | R        | Xing <i>et al.</i> , 2008              |
| <i>Arabidopsis thaliana</i>  | OE    | <i>OsWRKY6</i>    | <i>Xanthomonas oryzae pv. oryzae</i>                  | R        | Hwang <i>et al.</i> , 2011             |
| <i>Arabidopsis thaliana</i>  | OE    | <i>VqWRKY52</i>   | <i>Pseudomonas syringae</i>                           | R        | Wang <i>et al.</i> , 2017              |
| <i>Arabidopsis thaliana</i>  | OE    | <i>VqWRKY52</i>   | <i>Botrytis cinerea</i>                               | S        | Wang <i>et al.</i> , 2017              |
| <i>Arabidopsis thaliana</i>  | Si    | <i>AtWRKY57</i>   | <i>Botrytis cinerea</i>                               | R        | Jiang and Yu 2016                      |
| <i>Arabidopsis thaliana</i>  | Si    | <i>AtWRKY23</i>   | <i>Heterodera schachtii</i>                           | R        | Grunewald <i>et al.</i> , 2008         |
| <i>Arabidopsis thaliana</i>  | OE    | <i>OsWRKY23</i>   | <i>Pyricularia oryzae Cav</i>                         | R        | Shaojuan <i>et al.</i> , 2009          |
| <i>Arabidopsis thaliana</i>  | OE    | <i>OsWRKY23</i>   | <i>Pseudomonas syringae</i>                           | R        | Shaojuan <i>et al.</i> , 2009          |
| <i>Capsicum annuum</i>       | Si    | <i>CaWRKY58</i>   | <i>Ralstonia solanacearum</i>                         | S        | Wang <i>et al.</i> , 2012              |
| <i>Gossypium hirsutum</i>    | OE    | <i>GhWRKY15</i>   | <i>Colletotrichum gossypi/Phytophthora parasitica</i> | R/R      | Yu <i>et al.</i> , 2012                |
| <i>Nicotiana attenuata</i>   | Si    | <i>NaWRKY3</i>    | <i>Manduca sexta</i>                                  | S        | Skibbe <i>et al.</i> , 2008            |
| <i>Nicotiana attenuata</i>   | Si    | <i>NaWRKY6</i>    | <i>Manduca sexta</i>                                  | S        | Skibbe <i>et al.</i> , 2008            |
| <i>Nicotiana benthamiana</i> | OE    | <i>GhWRKY44</i>   | <i>Ralstonia solanacearum/Rhizoctonia solani</i>      | R/R      | Li <i>et al.</i> , 2014                |
| <i>Nicotiana sp.</i>         | OE    | <i>MdWRKY1</i>    | <i>Phytophthoraparasticavar.nicotianae</i>            | R        | Fan <i>et al.</i> , 2011               |
| <i>Oryza sativa</i>          | OE    | <i>OsWRKY45-1</i> | <i>Magnaporthe grisea</i>                             | R        | Tao <i>et al.</i> , 2009               |
| <i>Oryza sativa</i>          | OE    | <i>OsWRKY45-2</i> | <i>Magnaporthe grisea</i>                             | R        | Tao <i>et al.</i> , 2009               |
| <i>Oryza sativa</i>          | OE    | <i>OsWRKY62</i>   | <i>Xanthomonas oryzae pv. oryzae</i>                  | R        | Peng <i>et al.</i> , 2010              |
| <i>Oryza sativa</i>          | OE    | <i>OsWRKY28</i>   | <i>Xanthomonas oryzae pv. oryzae</i>                  | R        | Peng <i>et al.</i> , 2010              |
| <i>Oryza sativa</i>          | OE    | <i>OsWRKY71</i>   | <i>Xanthomonas oryzae pv. oryzae</i>                  | R        | Peng <i>et al.</i> , 2010              |
| <i>Oryza sativa</i>          | OE    | <i>OsWRKY76</i>   | <i>Xanthomonas oryzae pv. oryzae</i>                  | R        | Peng <i>et al.</i> , 2010              |
| <i>Oryza sativa</i>          | Si    | <i>OsWRKY22</i>   | <i>Magnaporthe oryzae</i>                             | S        | Abbruscato <i>et al.</i> , 2012        |
| <i>Oryza sativa</i>          | OE    | <i>OsWRKY22</i>   | <i>Magnaporthe oryzae</i>                             | R        | Abbruscato <i>et al.</i> , 2012        |
| <i>Oryza sativa</i>          | OE    | <i>OsWRKY80</i>   | <i>Rhizoctonia solani</i>                             | R        | Peng <i>et al.</i> , 2016              |
| <i>Populus tomentosa</i>     | OE    | <i>PtrWRKY89</i>  | <i>Dothiorella gregaria</i>                           | R        | Jiang <i>et al.</i> , 2014             |
| <i>Solanum lycopersicum</i>  | Si    | <i>SlWRKY70</i>   | <i>Meloidogyne javanica</i>                           | S        | Atamian <i>et al.</i> , 2012           |
| <i>Solanum lycopersicum</i>  | Si    | <i>SlWRKY70</i>   | <i>Macrosiphum euphorbiae</i>                         | S        | Atamian <i>et al.</i> , 2012           |

At - *Arabidopsis thaliana*, Ca - *Capsicum annuum*, Fa - *Fragaria x ananassa*, Gh - *Gossypium hirsutum*, Md - *Malus domestica*, Na - *Nicotiana attenuata*, Os - *Oryza sativa*, Ptr - *Populus trichocarpa*, Sl - *Solanum lycopersicum*, Vq - *Vitis quinquangularis*.

## References

- Abbruscato P, Nepusz T, Mizzi L, Del Corvo M, Morandini P, Fumasoni I, Michel C, Paccanaro A, Guiderdoni E, Schaffrath U, *et al.* (2012) *OsWRKY22*, a monocot WRKY gene, plays a role in the resistance response to blast. *Mol Plant Pathol* 13:828–841.
- Atamian HS, Eulgem T and Kaloshian I (2012) *SlWRKY70* is required for Mi-1-mediated resistance to aphids and nematodes in tomato. *Planta* 235:299-309.
- Duan Y, Jiang Y, Ye S, Karim A, Ling Z, He Y, Yang S and Luo K (2015) *PtrWRKY73*, a salicylic acid-inducible poplar WRKY transcription factor, is involved in disease resistance in *Arabidopsis thaliana*. *Plant Cell Rep* 34:831-841.
- Encinas-Villarejo S, Maldonado AM, Amil-Ruiz F, de los Santos B, Romero F, Pliego-Alfaro F, Muñoz-Blanco J and Caballero JL (2009) Evidence for a positive regulatory role of strawberry (*Fragaria x ananassa*) *FaWRKY1* and *Arabidopsis AtWRKY75* proteins in resistance. *J Exp Bot* 60:3043-3065.
- Fan H, Wang F, Gao H, Wang L, Xu J and Zhao Z (2011) Pathogen-induced *MdWRKY1* in “Qinguan” apple enhances disease resistance. *J Plant Biol* 54:150-158.
- Grunewald W, Karimi M, Wieczorek K, Van de Cappelle E, Wischnitzki E, Grundler F, Inzé D, Beeckman T and Gheysen G (2008) A role for *AtWRKY23* in feeding site establishment of plant-parasitic nematodes. *Plant Physiol* 148:358-368.
- Hwang SH, Yie SW and Hwang DJ (2011) Heterologous expression of *OsWRKY6* gene in *Arabidopsis* activates the expression of defense related genes and enhances resistance to pathogens. *Plant Sci* 181:316–323.
- Jiang Y and Yu D (2016) The *WRKY57* transcription factor affects the expression of jasmonate ZIM-Domain genes transcriptionally to compromise *Botrytis cinerea* resistance. *Plant Physiol* 171:2771-82.
- Jiang Y, Duan Y, Yin J, Ye S, Zhu J, Zhang F, Lu W, Fan D and Luo K (2014) Genome-wide identification and characterization of the *Populus* WRKY transcription factor family and analysis of their expression in response to biotic and abiotic stresses. *J Exp Bot* 65:6629-6644.
- Jiang Y, Guo L, Liu R, Jiao B, Zhao X, Ling Z and Luo K (2016) Overexpression of Poplar *PtrWRKY89* in transgenic *Arabidopsis* leads to a reduction of disease resistance by regulating defense related genes in salicylate and jasmonate dependent signaling. *PLoS One* 11:0149137.
- Li J, Wang J, Wang N, Guo X and Gao Z (2014) *GhWRKY44*, a WRKY transcription factor of cotton, mediates defense responses to pathogen infection in transgenic *Nicotiana benthamiana*. *Plant Cell Tissue Organ Cult* 121:127-140.
- Peng X, Wang H, Jang JC, Xiao T, He H, Jiang D and Tang X (2016) *OsWRKY80-OsWRKY4* module as a positive regulatory circuit in rice resistance against *Rhizoctonia solani*. *Rice* 9:1-14.

- Peng Y, Bartley L, Canlas P and Ronald P (2010) OsWRKYIIa transcription factors modulate rice innate immunity. *Rice* 3:36-42.
- Shaojuan SJ, Zhou X, Song Y and Yu D (2009) Heterologous expression of *OsWRKY23* gene enhances pathogen defense and dark-induced leaf senescence in *Arabidopsis*. *Plant Growth Regul* 58:181-190.
- Skibbe M, Qu N, Galis I and Baldwin IT (2008) Induced plant defenses in the natural environment: *Nicotiana attenuata* WRKY3 and WRKY6 Coordinate responses to herbivory. *Plant Cell* 20:1984-2000.
- Tao Z, Liu H, Qiu D, Zhou Y, Li X, Xu C and Wang S (2009) A pair of allelic WRKY genes play opposite roles in rice-bacteria interactions. *Plant Physiol* 151:936-948.
- Wang X, Guo R, Tu M, Wang D, Guo C, Wan R, Li Z and Wang X (2017) Ectopic expression of the wild grape WRKY transcription factor *VqWRKY52* in *Arabidopsis thaliana* enhances resistance to the biotrophic pathogen powdery mildew but not to the necrotrophic pathogen *Botrytis cinerea*. *Front Plant Sci* 31:97.
- Wang Y, Dang F, Liu Z, Wang X, Eulgem T, Lai Y, Yu L, She J, Shi Y, Lin J, *et al.* (2012) *CaWRKY58*, encoding a group I WRKY transcription factor of *Capsicum annuum*, negatively regulates resistance to *Ralstonia solanacearum* infection. *Mol Plant Pathol* 14:131-144.
- Xing DH, Lai ZB, Zheng ZY, Vinod KM, Fan BF and Chen ZX (2008) Stress-and pathogen-induced *Arabidopsis* WRKY48 is a transcriptional activator that represses plant basal defense. *Mol Plant* 1:459-470.
- Yu F, Huaxia Y, Lu W, Wu C, Cao X and Guo X (2012) *GhWRKY15*, a member of the WRKY transcription factor family identified from cotton (*Gossypium hirsutum* L.), is involved in disease resistance and plant development. *BMC Plant Biol* 12:144.
