# Supplementary material for: Can WRKY transcription factors help plants to overcome environmental challenges?
Source: PubMed Central journal article supplement (PMC6136380; doi:10.1590/1678-4685-gmb-2017-0232), 2018
Supplement: 1415-4757-GMB-41-03-2017-0232-20180717-suppl3.pdf [file 1415-4757-GMB-41-03-2017-0232-20180717-suppl3.pdf]

## Supplementary Material to "Can WRKY transcription factors help plants to overcome environmental challenges?"

**Table S3** - Gene transformation studies performed with *WRKY* genes in different plant species in response to biotic and abiotic stresses. Event (Si: silence, OE: overexpression); reaction: their phenotype observed against certain stress (T: Tolerance, R: Resistance, S: Sensitivity or Susceptibility) and the reference source

| Species                      | Event | Gene            | Stress                                                          | Reaction | Reference                     |
|------------------------------|-------|-----------------|-----------------------------------------------------------------|----------|-------------------------------|
| <i>Arabidopsis thaliana</i>  | OE    | <i>VpWRKY1</i>  | <i>Erysiphe cichoracearum</i> /Salt                             | R/T      | Li <i>et al.</i> , 2010       |
| <i>Arabidopsis thaliana</i>  | OE    | <i>VpWRKY2</i>  | <i>Erysiphe cichoracearum</i> /Salt and Cold                    | R/T      | Li <i>et al.</i> , 2010       |
| <i>Arabidopsis thaliana</i>  | OE    | <i>OsWRKY45</i> | <i>Pseudomonas syringae</i> tomato / Salt and drought           | R /T     | Qiu and Yu, 2009              |
| <i>Nicotiana benthamiana</i> | OE    | <i>GhWRKY27</i> | <i>Rhizoctonia solani</i> /Drought                              | S/S      | Yan <i>et al.</i> , 2015      |
| <i>Nicotiana tabacum</i>     | OE    | <i>VpWRKY3</i>  | <i>Ralstonia solanacearum</i> /Salt                             | R/T      | Zhu <i>et al.</i> , 2012      |
| <i>Oryza sativa</i>          | OE    | <i>OsWRKY89</i> | <i>Magnaporthe griseae</i> and <i>Sogatella furcifera</i> /UV-B | R/T      | Wang <i>et al.</i> , 2017     |
| <i>Oryza sativa</i>          | Si    | <i>OsWRKY89</i> | <i>Magnaporthe griseae</i> and <i>Sogatella furcifera</i> /UV-B | S/S      | Wang <i>et al.</i> , 2017     |
| <i>Oryza sativa</i>          | OE    | <i>OsWRKY76</i> | <i>Magnaporthe oryzae</i> /Cold                                 | T/S      | Yokotani <i>et al.</i> , 2013 |

Gh – *Gossypium hisutum*, Os - *Oryza sativa*, Vp – *Vitis pseudoreticulata*.

### References

- Li H, Xu Y, Xiao Y, Zhu Z, Xie X, Zhao H and Wang Y (2010) Expression and functional analysis of two genes encoding transcription factors, *VpWRKY1* and *VpWRKY2*, isolated from Chinese wild *Vitis pseudoreticulata*. *Planta* 232:1325-1337.
- Qiu Y and Yu D (2009) Over-expression of the stress-induced *OsWRKY45* enhances disease resistance and drought tolerance in *Arabidopsis*. *Environ Exp Bot* 65:35-47.
- Wang X, Guo R, Tu M, Wang D, Guo C, Wan R, Li Z and Wang X (2017) Ectopic expression of the wild grape WRKY transcription factor *VqWRKY52* in *Arabidopsis thaliana* enhances resistance to the biotrophic pathogen powdery mildew but not to the necrotrophic pathogen *Botrytis cinerea*. *Front Plant Sci* 31:97.
- Yan Y, Jia H, Wang F, Wang C, Shuchang Liu and Xingqi Guo (2015) Overexpression of *GhWRKY27a* reduces tolerance to drought stress and resistance to *Rhizoctonia solani* infection in transgenic *Nicotiana benthamiana*. *Front Physiol* 6:265.
- Yokotani N, Sato Y, Tanabe S, Chujo T, Shimizu T, Okada K, Yamane H, Shimono M, Sugano S, Takatsuji H, *et al.* (2013) WRKY76 is a rice transcriptional repressor playing opposite roles in blast disease resistance and cold stress tolerance. *J Exp Bot* 64:5085-5097.

Zhu Z, Shi J, Cao J, He M and Wang Y (2012) *VpWRKY3*, a biotic and abiotic stress-related transcription factor from the Chinese wild *Vitis pseudoreticulata*. *Plant Cell Rep* 31:2109-2120.
